# Supplementary material for: Hyperglycemia and Hypoglycemia Are Associated with In-Hospital Mortality among Patients with Coronavirus Disease 2019 Supported with Extracorporeal Membrane Oxygenation
Source: MDPI journal article supplement (doi:10.3390/jcm11175106), 2022-08-30

**Supplementary Table S1. Missing data**

| Variable               | Number of missing | Variable                                             | Number of missing |
|------------------------|-------------------|------------------------------------------------------|-------------------|
| Male sex               | 0                 | BT                                                   | 7                 |
| Age                    | 0                 | WBC                                                  | 0                 |
| Hight                  | 0                 | BUN                                                  | 2                 |
| Weight                 | 0                 | Creatinine                                           | 12                |
| BMI                    | 0                 | AST                                                  | 4                 |
| Hypertension           | 0                 | ALT                                                  | 4                 |
| History of diabetes    | 0                 | Initial glucose                                      | 16                |
| Chronic renal disease  | 0                 | Glucose before ventilator                            | 53                |
| Cerebral disease       | 0                 | Glucose before ECMO                                  | 55                |
| Cancer                 | 4                 | Max glucose                                          | 53                |
| Heart failure          | 0                 | Min glucose                                          | 56                |
| Ischemic heart disease | 0                 | SOFA                                                 | 53                |
| Dyslipidaemia          | 0                 | PaO <sub>2</sub> /FiO <sub>2</sub> ratio before ECMO | 16                |
| Arrhythmia             | 0                 | Ventilator to ECMO >7 days                           | 4                 |
| COPD                   | 0                 | Cardiac arrest before ECMO start                     | 8                 |
| Smoking                | 0                 | Inotropic use before ECMO                            | 12                |
| Initial systolic BP    | 6                 | Steroid use                                          | 14                |
| Initial diastolic BP   | 6                 | RRT before ECMO                                      | 9                 |
| HR                     | 6                 | Mortality                                            | 0                 |

BP, blood pressure; HR, heart rate; BT, body temperature; WBC, white blood cell; BUN, blood urea nitrogen; AST, aspartate aminotransferase; ALT, alanine aminotransferase; ECMO, extracorporeal membrane oxygenation; SOFA, sequential organ failure assessment; PaO<sub>2</sub>/FiO<sub>2</sub>, partial pressure of arterial oxygen over fractional inspired oxygen. RRT, renal replacement therapy

**Supplementary Table S2. Patients 'characteristics**

| Variable               | Survivors<br>(n = 85) | Nonsurvivors<br>(n = 110) | p-value |
|------------------------|-----------------------|---------------------------|---------|
| Male sex               | 60 (70.6)             | 76 (69.1)                 | 0.47    |
| Age, years             | 60 (50-60.5)          | 64 (56-69)                | 0.002   |
| Hight, cm              | 166.32 (9.17)         | 165.43 (7.35)             | 0.45    |
| Weight, kg             | 73 (65-86)            | 69 (62-78)                | 0.01    |
| BMI, kg/m <sup>2</sup> | 26.4 (24.55-30.95)    | 25.25 (23.3-27.45)        | 0.06    |
| Hypertension           | 47 (55.3)             | 56 (50.9)                 | 0.28    |
| Diabetes               | 21 (24.7)             | 46 (39.1)                 | 0.02    |
| Chronic renal disease  | 4 (4.7)               | 5 (4.5)                   | 0.70    |
| Cerebral disease       | 4 (4.7)               | 8 (7.3)                   | 0.29    |
| Cancer                 | 0                     | 7 (6.4)                   | 0.04    |
| Heart failure          | 2 (2.4)               | 2 (1.8)                   | 0.68    |
| Ischemic heart disease | 1 (1.2)               | 5 (4.5)                   | 0.22    |
| Dyslipidaemia          | 15 (17.6)             | 15 (13.6)                 | 0.44    |
| Arrhythmia             | 1 (1.2)               | 1 (0.9)                   | 0.70    |
| COPD                   | 0                     | 1 (0.9)                   | 0.63    |
| Smoking                |                       |                           | 0.01    |

|                |           |           |
|----------------|-----------|-----------|
| Current smoker | 9 (10.6)  | 4 (3.6)   |
| Ex-smoker      | 11 (12.9) | 12 (10.9) |
| Never smoker   | 58 (68.2) | 67 (60.9) |

Values are presented as mean (SD) or median (IQR) or n (%).

BMI, body mass index; COPD, chronic obstructive pulmonary disease

**Supplementary Table S3. Data of initial vital signs and laboratory test**

| Variable                                                   | Survivors<br>(n = 85) | Nonsurvivors<br>(n = 110) | <i>p</i> -value |
|------------------------------------------------------------|-----------------------|---------------------------|-----------------|
| Initial systolic BP, mmHg                                  | 133 (117-149.75)      | 127 (112-149)             | 0.42            |
| Initial diastolic BP, mmHg                                 | 82.37 (15.97)         | 75.30 (16.16)             | <0.01           |
| HR, /min                                                   | 88.5 (76-109.5)       | 91 (76.5-102)             | 0.83            |
| BT, °C                                                     | 37.10 (36.7-37.5)     | 37 (36.5-37.6)            | 0.61            |
| WBC, 10 <sup>3</sup> /mm <sup>3</sup>                      | 8.4 (5.44-12.04)      | 7.45 (5.36-12.02)         | 0.59            |
| BUN, mg/dL                                                 | 18.8 (14.65-23.9)     | 20.5 (14.88-30.11)        | 0.09            |
| Creatinine, mg/dL                                          | 0.82 (0.66-1.16)      | 0.87 (0.65-1.35)          | 0.63            |
| AST, U/L                                                   | 50 (34-83)            | 53 (40.9-88.75)           | 0.26            |
| ALT, U/L                                                   | 35 (22-55.5)          | 37 (24-65)                | 0.49            |
| Initial glucose, mg/dL                                     | 148 (125-198)         | 154 (115-213)             | 0.99            |
| Glucose before ventilator, mg/dL                           | 156 (130.5-186.25)    | 159.5 (121-247.75)        | 0.64            |
| Glucose before ECMO, mg/dL                                 | 172.5 (138-229.5)     | 202.5 (159-278)           | 0.01            |
| Max glucose, mg/dL                                         | 320.5 (241.25-405.25) | 339 (275.25-421.75)       | 0.33            |
| Min glucose, mg/dL                                         | 103 (87.5-121.5)      | 85 (59-108)               | <0.01           |
| SOFA                                                       | 7.5 (6-10)            | 9 (7-12)                  | 0.02            |
| PaO <sub>2</sub> /FiO <sub>2</sub> ratio before ECMO, mmHg | 76.95 (59.93-100.68)  | 73.09 (59.85-97.06)       | 0.55            |
| Ventilator to ECMO >7 days                                 | 15(17.9)              | 30(28.0)                  | 0.10            |
| Cardiac arrest before ECMO start                           | 5 (6.0)               | 10 (9.7)                  | 0.35            |
| Inotropic use before ECMO                                  | 44 (53.7)             | 61 (60.4)                 | 0.36            |
| Steroid use                                                | 73 (98.6)             | 104 (97.2)                | 0.51            |
| RRT before ECMO                                            | 4 (4.8)               | 15 (14.7)                 | 0.03            |

Values are presented as mean (SD) or median (IQR) or n (%).

BP, blood pressure; HR, heart rate; BT, body temperature; WBC, white blood cell; BUN, blood urea nitrogen; AST, aspartate aminotransferase; ALT, alanine aminotransferase; ECMO, extracorporeal membrane oxygenation; SOFA, sequential organ failure assessment; PaO<sub>2</sub>/FiO<sub>2</sub>, partial pressure of arterial oxygen over fractional inspired oxygen. RRT, renal replacement therapy

**Supplementary Table S4.** Cox regression analysis for mortality after ECMO support in COVID-19

|                                      | Model 1              |                 | Model 2              |                 | Model 3               |                 | Model 4               |                 |
|--------------------------------------|----------------------|-----------------|----------------------|-----------------|-----------------------|-----------------|-----------------------|-----------------|
| Variable                             | HR (95% CI)          | <i>P</i> -value | HR (95% CI)          | <i>p</i> -value | HR (95% CI)           | <i>P</i> -value | HR (95% CI)           | <i>P</i> -value |
| Age, years                           |                      |                 |                      |                 |                       |                 |                       |                 |
| < 50                                 | Reference            |                 | Reference            |                 | Reference             |                 | Reference             |                 |
| 50–59                                | 1.13<br>(0.45–2.83)  | 0.80            | 1.06<br>(0.41–2.76)  | 0.91            | 0.95 (0.40–<br>2.23)  | 0.90            | 1.20<br>(0.59–2.42)   | 0.62            |
| 60–69                                | 1.79<br>(0.84–3.83)  | 0.13            | 1.93<br>(0.86–4.36)  | 0.11            | 1.60 (0.80–<br>3.22)  | 0.19            | 1.69 (0.93–<br>3.06)  | 0.09            |
| ≥70                                  | 2.25<br>(0.98–5.18)  | 0.06            | 2.73<br>(1.11–6.70)  | 0.03            | 2.07 (0.91–<br>4.67)  | 0.08            | 1.81<br>(0.89–3.70)   | 0.10            |
| BMI, kg/m <sup>2</sup>               |                      |                 |                      |                 |                       |                 |                       |                 |
| <18.5                                | 9.78<br>(2.10–45.66) | <0.01           | 9.48<br>(2.07–43.39) | <0.01           | 13.80<br>(2.90–65.62) | <0.01           | 11.35<br>(2.56–50.40) | <0.01           |
| 18.5–24.9                            | Reference            |                 | Reference            |                 | Reference             |                 | Reference             |                 |
| ≥25                                  | 0.88<br>(0.54–1.43)  | 0.59            | 0.78<br>(0.48–1.26)  | 0.31            | 0.85 (0.52–<br>1.38)  | 0.51            | 0.97<br>(0.63–1.48)   | 0.87            |
| RRT before ECMO                      | 2.19<br>(1.04–4.59)  | 0.04            | 2.25<br>(1.15–4.41)  | 0.02            | 3.09<br>(1.62–6.38)   | <0.01           | 2.49<br>(1.39–4.48)   | <0.01           |
| Glucose before ventilator >200 mg/dL | 1.47<br>(0.89–2.43)  | 0.14            | -                    | -               | -                     | -               | -                     | -               |
| Glucose before ECMO >200 mg/dL       | -                    | -               | 1.93<br>(1.19–3.13)  | <0.01           | -                     | -               | -                     | -               |
| Minimal glucose <70 mg/dL            | -                    | -               | -                    | -               | 3.61<br>(2.15–6.05)   | <0.01           | -                     | -               |
| Diabetes history                     | -                    | -               | -                    | -               | -                     | -               | 1.32<br>(0.87–2.00)   | 0.19            |

ECMO, extracorporeal membrane oxygenation; RRT, renal replacement therapy; DM, diabetes mellitus; BMI, body mass index; HR, hazard ratio; CI, confidence interval

Supplementary Figure S1. Survival curves

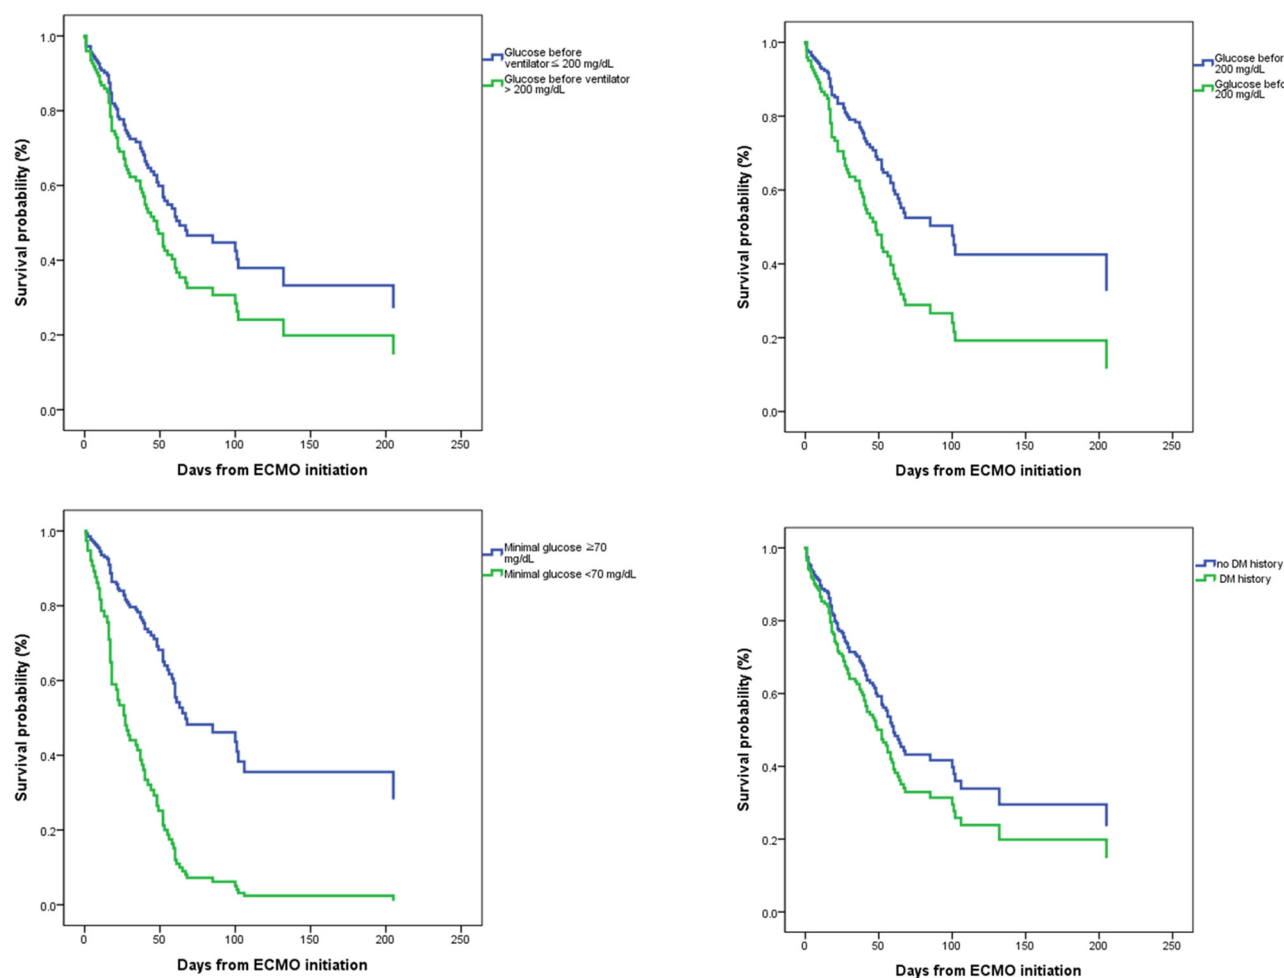

Supplementary Figure S2. Survival curves

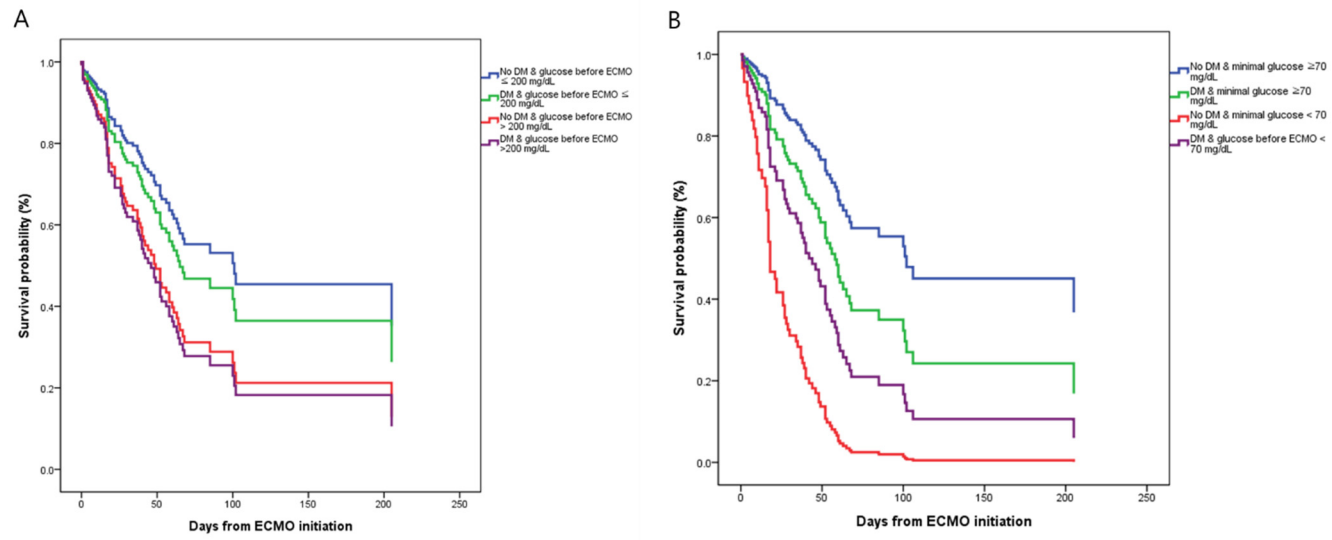

Supplement: s1 [file s1]
